# Supplementary material
Source: PubMed Central journal article supplement (PMC1458643)

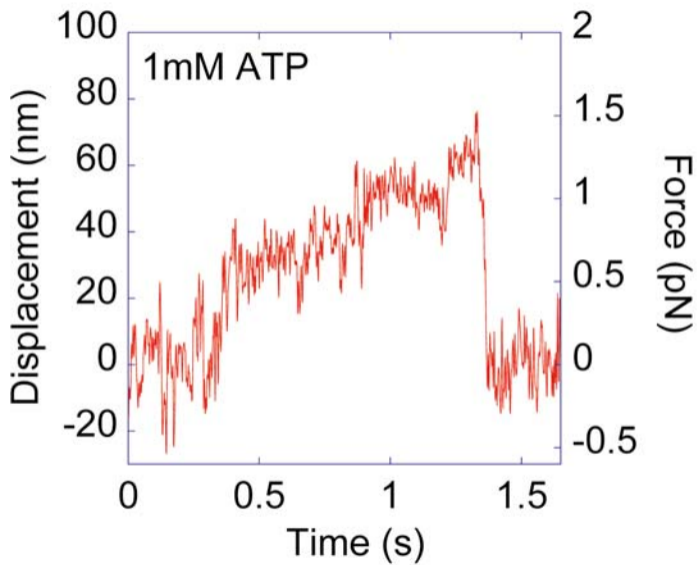

Supplement: pnas_0508511103_1.pdf [file pnas_0508511103_1.pdf]

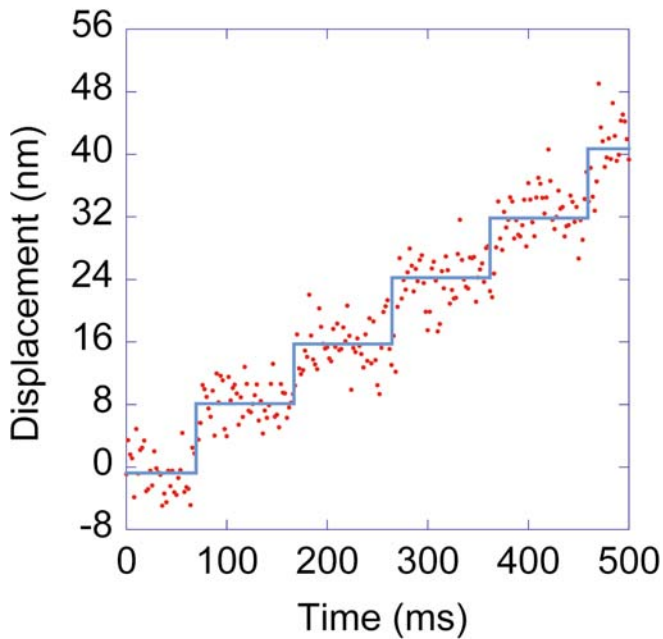

Supplement: pnas_0508511103_2.pdf [file pnas_0508511103_2.pdf]
